# Supplementary material for: Classifier uncertainty: evidence, potential impact, and probabilistic treatment
Source: PeerJ journal article supplement (doi:10.7717/peerj-cs.398), 2021-03-04
Supplement: supplementary.pdf [file supplementary.pdf]

# 1 Supporting Information for 2 Classifier uncertainty: evidence, potential 3 impact, and probabilistic treatment

4 Niklas Tötsch<sup>1</sup> and Daniel Hoffmann<sup>1</sup>

5 <sup>1</sup>Faculty of Biology, University of Duisburg-Essen, Essen, Germany

6 Corresponding author:

7 Niklas Tötsch<sup>1</sup>

8 Email address: niklas.toetsch@uni-due.de

## 9 PRIORS

10 The prior distribution can be interpreted as expression of previous knowledge, which in turn can be  
11 expressed in terms of previous observations. In this sense, the Laplace (or flat) prior is equivalent to  
12 two previous observations for each prevalence ( $\phi$ ), true positive rate (TPR) and true negative rate (TNR),  
13 which is usually a questionable assumption. Since sample size ( $N$ ) is small in some of the examples  
14 discussed in this study, this assumption could have an impact on the posterior distribution. Nevertheless,  
15 we consider this prior to be the most suitable objective prior. Haldane's prior,  $\text{Beta}(\alpha = 0, \beta = 0)$ , is not  
16 adequate since it yields an improper posterior if any entry of the confusion matrix (CM) is zero, which is  
17 often the case. Jeffreys prior,  $\text{Beta}(\alpha = 0.5, \beta = 0.5)$ , does not have this problem but leads to implausible  
18 U-shaped priors for some metrics (Figure S2).

## 19 MARGINALS OF THE CONFUSION MATRIX

20 There are three scenarios for the marginals of the CM. In principle, the marginals of the columns and rows  
21 of the CM could both be fixed, which would mean that  $\phi$  and the number of positive/negative predictions  
22 are known exactly beforehand. Fisher's exact test was designed to evaluate whether a binary classifier  
23 performs better than random guessing for this specific case. Fisher (1922) It remains popular, yet the  
24 underlying assumption is usually violated. McElreath (2018); Gelman (2003)

25 A fixed  $\phi$  and an unspecified marginal on the predicted labels is more common. For instance, in  
26 a controlled study, test sets may be curated to include 50% patients suffering from a disease and 50%  
27 healthy subjects in a control group. In this example there is no uncertainty in  $\phi$ , but it is fixed at  $\phi=0.5$ .

28 If  $\phi$  in the test set is not deliberately chosen before the compilation, it must be determined from the  
29 data set. For small sample sizes,  $\phi$  is uncertain like all other metrics. In the present study, we infer  $\phi$  from  
30 the CM but our method also copes with fixed  $\phi$ .

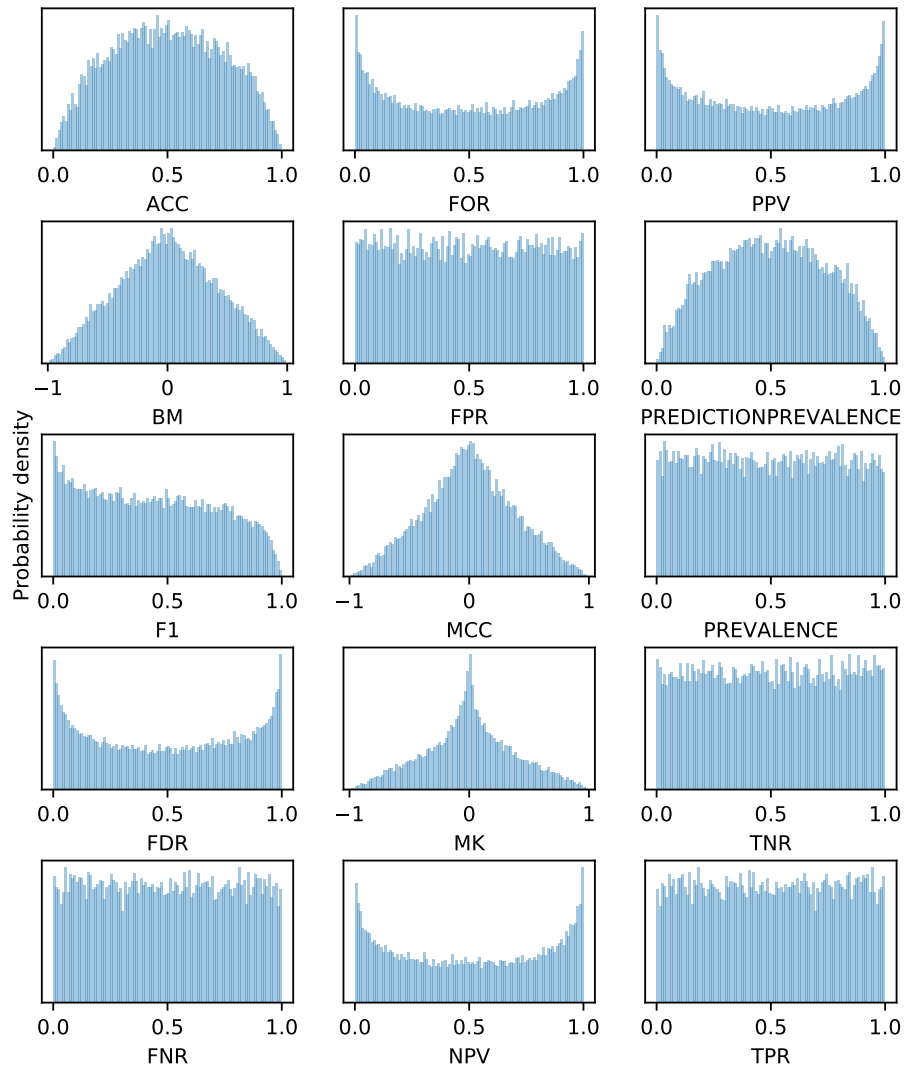

**Figure S1.** Priors on the metrics if Laplace priors are used for  $\phi$ , TPR, TNR

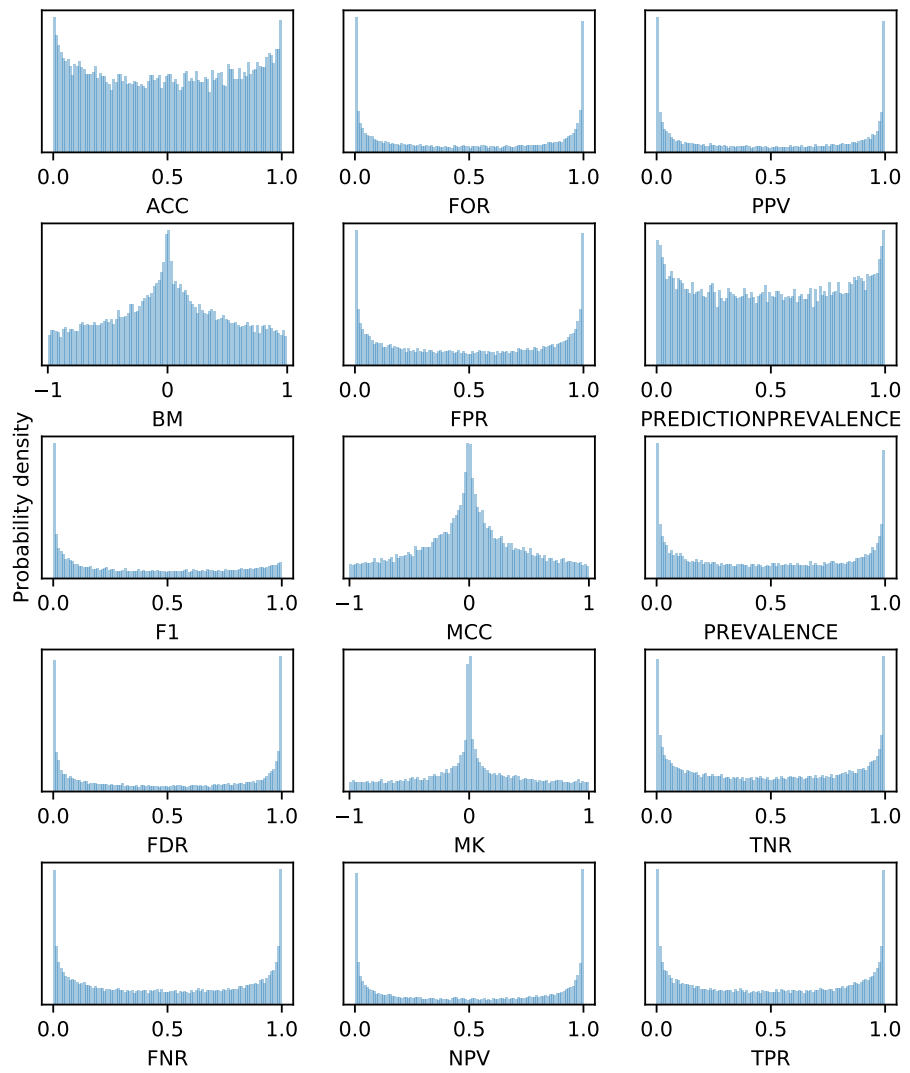

**Figure S2.** Priors on the metrics if Jeffreys priors are used for  $\phi$ , TPR, TNR

## LITERATURE EXAMPLES

**Table S1.** Literature examples of classifiers with small sample size ( $N$ ). Citations were recorded on Google Scholar on June 16th, 2020 at 12:55 pm CEST.

|     | DOI                             | Location   | TP  | FN | TN  | FP | N   | Citations |
|-----|---------------------------------|------------|-----|----|-----|----|-----|-----------|
| 1   | 10.1080/10629360903278800       | Table 2    | 5   | 0  | 3   | 0  | 8   | 10        |
| 2   | 10.1021/ci200579f               | Table 3    | 10  | 0  | 3   | 1  | 14  | 48        |
| 3   | 10.1021/ci020045                | Table 5    | 6   | 0  | 7   | 1  | 14  | 51        |
| 4a  | 10.1155/2015/485864             | Table 4    | 5   | 1  | 10  | 1  | 17  | 10        |
| 4b  | 10.1155/2015/485864             | Table 5    | 4   | 2  | 10  | 1  | 17  | 10        |
| 5a  | 10.1016/j.ejmech.2010.11.029    | Table 6    | 16  | 1  | 3   | 2  | 22  | 86        |
| 5b  | 10.1016/j.ejmech.2010.11.029    | Table 10   | 8   | 9  | 4   | 1  | 22  | 86        |
| 6a  | 10.1016/j.vascn.2014.07.002     | Table 2    | 2   | 12 | 19  | 1  | 34  | 77        |
| 6b  | 10.1016/j.vascn.2014.07.002     | Table 3    | 10  | 4  | 20  | 0  | 34  | 77        |
| 7a  | 10.5935/0103-5053.20130066      | Table 2    | 26  | 0  | 6   | 2  | 34  | 61        |
| 7b  | 10.5935/0103-5053.20130066      | Table 3    | 24  | 2  | 6   | 2  | 34  | 61        |
| 8   | 10.1016/j.scitotenv.2018.05.081 | Table 2    | 28  | 9  | 3   | 4  | 44  | 18        |
| 9a  | 10.4314/wsa.v36i4.58411         | Table 2    | 19  | 3  | 18  | 10 | 50  | 14        |
| 9b  | 10.4314/wsa.v36i4.58411         | Table 2    | 21  | 1  | 20  | 8  | 50  | 14        |
| 10  | 10.1016/j.bspc.2017.01.012      | Figure 2   | 31  | 5  | 24  | 4  | 64  | 80        |
| 11  | 10.1039/C7MD00633K              | Figure 3   | 40  | 7  | 15  | 8  | 70  | 9         |
| 12  | 10.3389/fnins.2018.01008        | Figure 3   | 31  | 9  | 20  | 13 | 73  | 1         |
| 13a | 10.4315/0362-028X-61.2.221      | Table 3    | 79  | 14 | 19  | 0  | 112 | 52        |
| 13b | 10.4315/0362-028X-61.2.221      | Table 3    | 89  | 4  | 16  | 3  | 112 | 52        |
| 14a | 10.1016/j.ancr.2014.06.005      | Figure 6.3 | 136 | 2  | 2   | 12 | 152 | 7         |
| 15a | 10.1016/j.saa.2016.09.028       | Table 2    | 3   | 12 | 150 | 0  | 165 | 65        |
| 15b | 10.1016/j.saa.2016.09.028       | Table 2    | 6   | 9  | 150 | 0  | 165 | 65        |
| 16  | 10.1021/acs.analchem.7b00426    | Table 3    | 188 | 0  | 13  | 2  | 203 | 28        |
| 14b | 10.1016/j.ancr.2014.06.005      | Table 3    | 253 | 27 | 11  | 59 | 350 | 7         |

32 **PROOF THAT VARIANCE OF METRIC DISTRIBUTIONS CALCULATED FROM**  
 33 **SYNTHETIC CONFUSION MATRICES IS SYSTEMATICALLY TOO LARGE**

34 For a confusion probability matrix ( $\theta$ ) following a Dirichlet distribution with parameter vector  $\alpha$

$$\theta \sim \text{Dirichlet}(\alpha) \quad (\text{S1})$$

35 where  $\alpha$  is the sum of the CM and the prior, the expected value and variance are

$$\text{E}[\theta_i] = \frac{\alpha_i}{\alpha_0} \quad (\text{S2})$$

$$\text{Var}[\theta_i] = \frac{\alpha_i}{\alpha_0} \left( \frac{1 - \frac{\alpha_i}{\alpha_0}}{1 + \alpha_0} \right) \quad (\text{S3})$$

36 where  $\alpha_0 = \sum \alpha_k$ . The expected value and variance of the entry  $V_i$  of a confusion matrix generated by a  
 37 multinomial distribution

$$V = [V_{\text{TP}}, V_{\text{FN}}, V_{\text{TN}}, V_{\text{FP}}] \sim \text{Multinomial}(\theta, N) \quad (\text{S4})$$

38 is given by

$$\text{E}[V_i] = N \frac{\alpha_i}{\alpha_0} = N \text{E}[\theta_i] \quad (\text{S5})$$

$$\text{Var}[V_i] = N(N + \alpha_0) \frac{\alpha_i}{\alpha_0} \left( \frac{1 - \frac{\alpha_i}{\alpha_0}}{1 + \alpha_0} \right) = N(N + \alpha_0) \text{Var}[\theta_i] \quad (\text{S6})$$

39 From this, we can calculate the expected value and variance for the proportion of  $i$ ,  $\frac{V_i}{N}$

$$\text{E}\left[\frac{V_i}{N}\right] = \frac{1}{N} \text{E}[V_i] = \text{E}[\theta_i] \quad (\text{S7})$$

$$\text{Var}\left[\frac{V_i}{N}\right] = \frac{1}{N^2} \text{Var}[V_i] = \left(1 + \frac{\alpha_0}{N}\right) \text{Var}[\theta_i] \quad (\text{S8})$$

40 Whereas  $\text{E}\left[\frac{V_i}{N}\right]$  is independent of  $N$ ,  $\text{Var}\left[\frac{V_i}{N}\right]$  is not. In Caelen's approach,  $N \approx \alpha_0$ . Therefore, the variance  
 41 will be overestimated by approximately a factor of two. Since the variance of  $\frac{V_i}{N}$  are overestimated w.r.t.  
 42  $\theta_i$ , the same holds for  $\frac{V}{N}$  w.r.t.  $\theta$  and metrics calculated on  $\frac{V}{N}$  and  $\theta$ , respectively.

43 If  $N$  was increased beyond  $\alpha_0$ , it would converge towards the true variance

$$\lim_{N \rightarrow \infty} \text{Var}\left[\frac{V_i}{N}\right] = \text{Var}[\theta_i]. \quad (\text{S9})$$

44 **RULE FOR SAMPLE SIZE DETERMINATION OF METRICS MODELED BY**  
 45 **A BETA DISTRIBUTION**

46 For a normal distribution, approximately 95% of the density are within two standard deviations  $\sigma$  from the  
 47 mean. Therefore, the length of the 95% highest posterior density interval will be close to  $4\sigma$ . According  
 48 to the central limit theorem, beta distributions behave for large sample sizes like normal distributions. The  
 49 standard deviation  $\sigma$  of a beta distribution is given by

$$\sigma = \sqrt{\frac{\alpha \cdot \beta}{(\alpha + \beta)^2 (\alpha + \beta + 1)}}. \quad (\text{S10})$$

50 where  $\alpha$  and  $\beta$  are the counts of observations per class, where the meaning of “class” depends on the  
 51 studied metric. As discussed in the main text, if one is looking at accuracy (ACC),  $\alpha$  denotes correct  
 52 classifications (TP + TN) and  $\beta$  denotes wrong classifications (FP + FN). In the case of TPR,  $\alpha$  counts  
 53 the number of true positives (TPs) whereas  $\beta$  counts false negatives (FNs).

54 To make explicit the dependency on sample size  $N$ , we express  $\alpha$  as  $a \cdot N$  and  $\beta$  as  $b \cdot N$  with fractions  
 55  $a = \frac{\alpha}{N}, b = \frac{\beta}{N}$  of the two classes.

$$\sigma = \sqrt{\frac{a \cdot N \cdot b \cdot N}{(a \cdot N + b \cdot N)^2 (a \cdot N + b \cdot N + 1)}} \quad (\text{S11})$$

$$\sigma = \sqrt{\frac{N^2 \cdot a \cdot b}{N^2 (a + b)^2 (N(a + b) + 1)}} \quad (\text{S12})$$

$$\sigma = \sqrt{\frac{a \cdot b}{(a + b)^2 (N(a + b) + 1)}} \quad (\text{S13})$$

56 Since  $\alpha + \beta = N$ , we know that  $a + b = 1$ . Now we can simplify Equation S13 to

$$\sigma = \sqrt{\frac{a \cdot b}{N + 1}} \quad (\text{S14})$$

57 For large  $N$ , this approximates to

$$\sigma \approx \sqrt{\frac{a \cdot b}{N}} \quad (\text{S15})$$

58  $\sigma$  is largest if  $a = b = 0.5$ .

$$\sigma_{max} \approx \sqrt{\frac{0.5 \cdot 0.5}{N}} \quad (\text{S16})$$

$$\sigma_{max} \approx \frac{0.5}{\sqrt{N}} \quad (\text{S17})$$

59 In the main text, we have defined metric uncertainty (MU) as the length of the 95% highest posterior  
 60 density interval. Therefore, its upper limit can be approximated as  $4\sigma \approx \frac{2}{\sqrt{N}}$ . If one cannot reject the  
 61 possibility that  $a = b = 0.5$ , one will need  $\frac{4}{MU^2}$  samples to obtain the desired MU.

## 62 SIMULATED CLASSIFIER

63 We have simulated a classifier with known properties.  $\phi$  is 50%, TPR equals 80%, and TNR is 60%.  
 64 Bookmaker informedness (BM) is therefore 40%. We calculate  $\theta_{TP}$ ,  $\theta_{FN}$ ,  $\theta_{TN}$ , and  $\theta_{FP}$  as described in  
 65 subsection 2.1. Confusion matrices of varying sizes are generated according to a multinomial distribution  
 66  $\text{Mult}(\theta = \{\theta_{TP}, \theta_{FN}, \theta_{TN}, \theta_{FP}\}, N)$ . Posterior distributions of BM are determined as usual and compared to  
 67 the true value and the point estimate from the confusion matrices (Figure S3).

## 68 REFERENCES

- 69 Fisher, R. (1922). On the interpretation of  $\chi^2$  from contingency tables, and the calculation of P. *J. R. Stat.*  
 70 *Soc.*, 85(1):87–94.  
 71 Gelman, A. (2003). A Bayesian Formulation of Exploratory Data Analysis and Goodness-of-fit Testing\*.  
 72 *Int. Stat. Rev.*, 71(2):369–382.  
 73 McElreath, R. (2018). *Statistical rethinking: A Bayesian course with examples in R and Stan*. Chapman  
 74 and Hall/CRC.

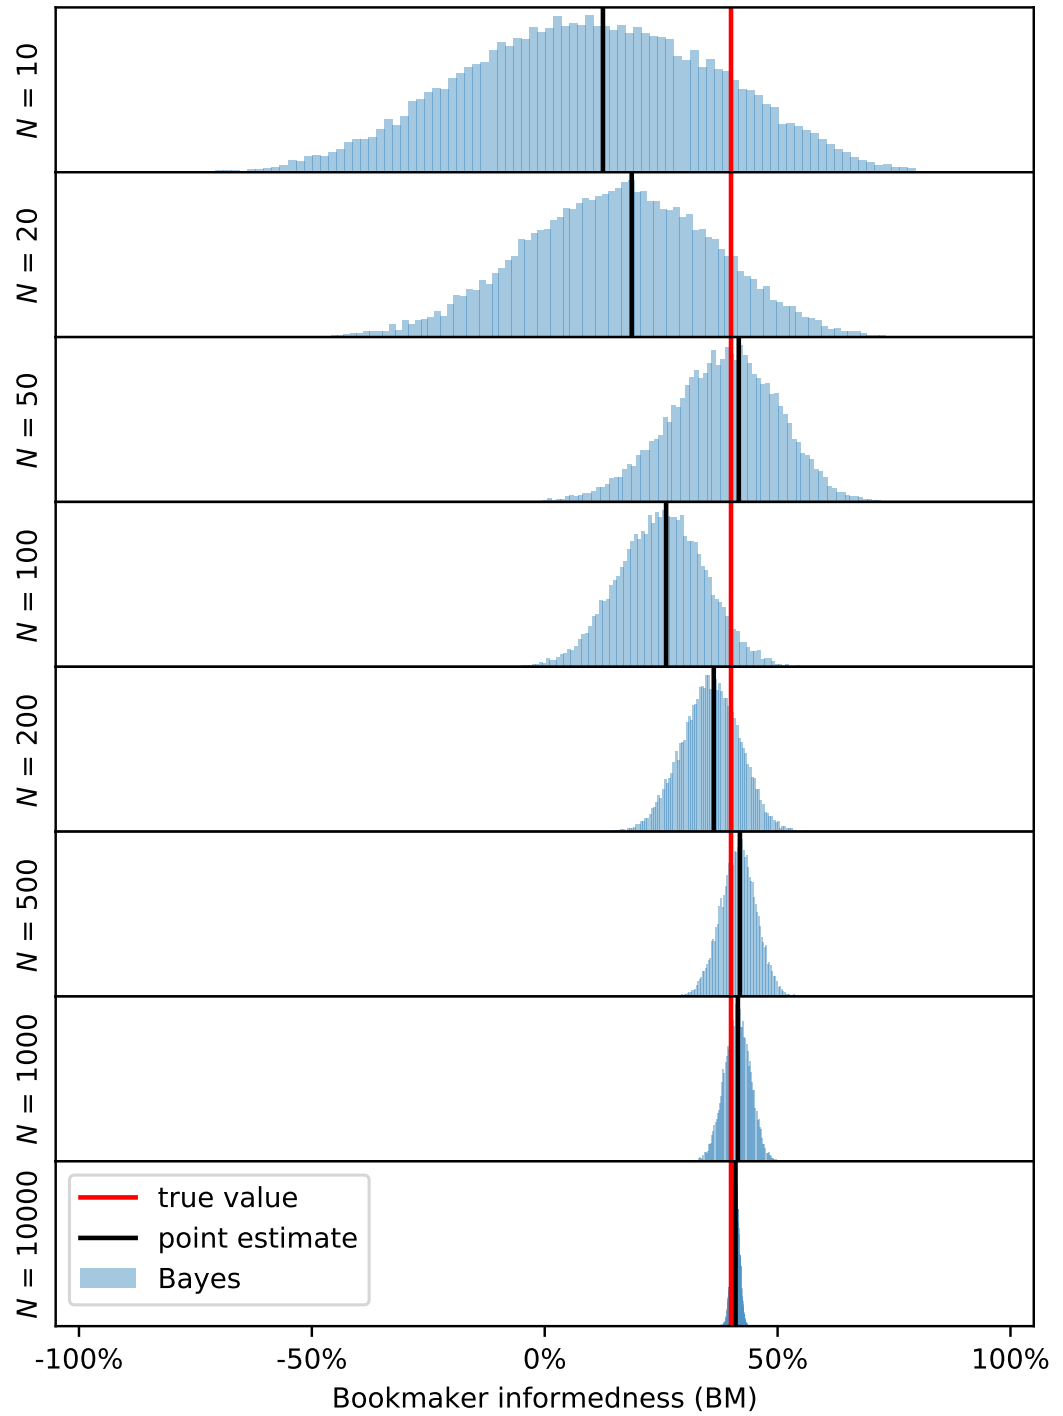

**Figure S3.** Metric uncertainty (MU) at varying sample sizes for a simulated classifier with known properties
